# Supplementary material for: Claudin-18.2 mediated interaction of gastric Cancer cells and Cancer-associated fibroblasts drives tumor progression
Source: PubMed Central journal article supplement (PMC10777637; doi:10.1186/s12964-023-01406-8), 2024-01-10

# Unedited blot and gel images

## Full unedited blots for Figure 3B

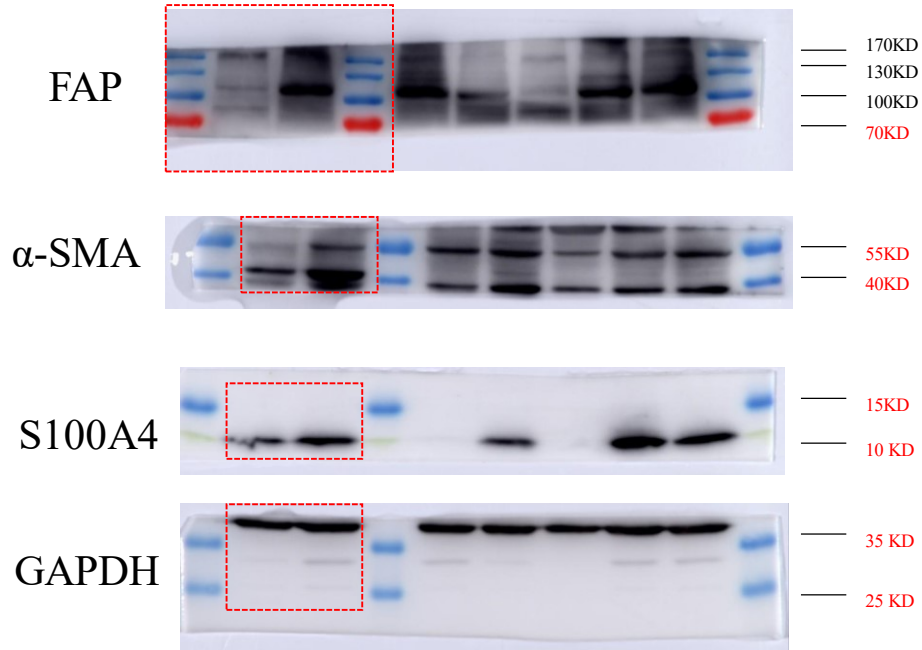

## Full unedited blots for Figure 3C

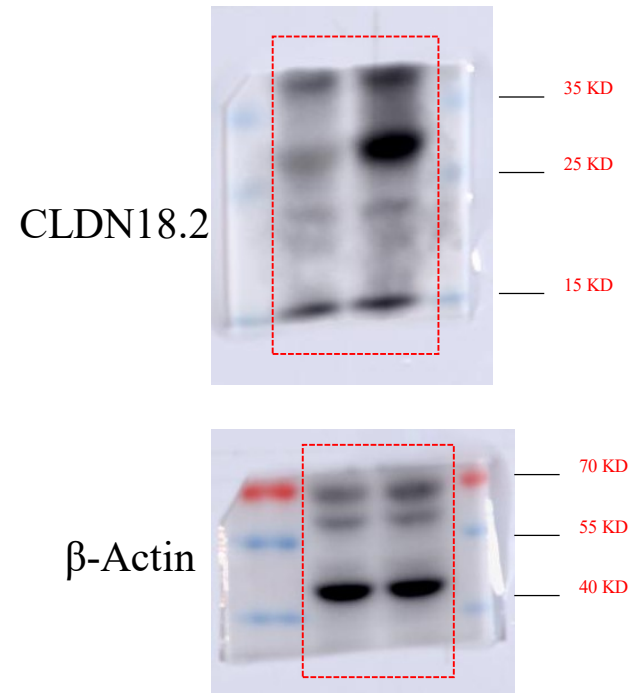

## Full unedited blots for Figure 6C

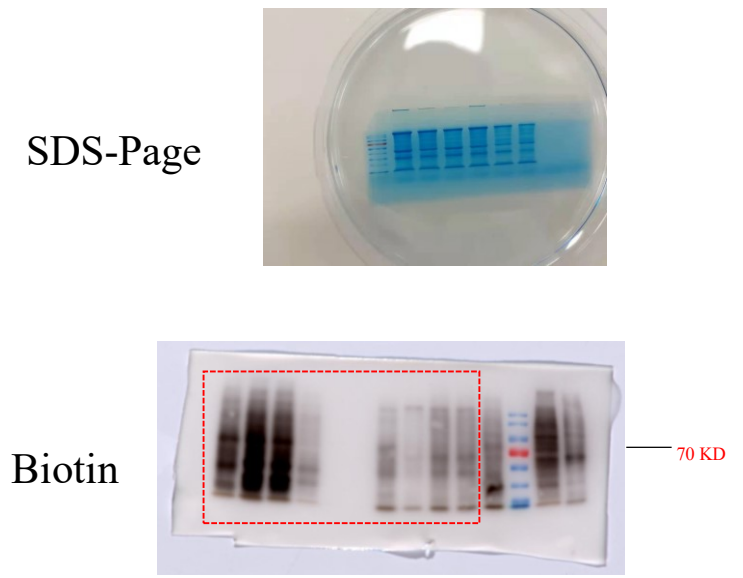

Supplement: 12964_2023_1406_MOESM2_ESM.pdf [file 12964_2023_1406_MOESM2_ESM.pdf]
